# Supplementary material for: Consumers’ Acceptance, Emotions, and Responsiveness to Informational Cues for Air-Fried Catfish (Ictalurus punctatus) Skin Chips
Source: MDPI journal article supplement (doi:10.3390/foods12071536), 2023-04-05
Supplement: s1 [file s1]

## Supplementary Materials

**Table S1.** Proximate Analysis<sup>^</sup> of catfish skin (% dry wt basis).

| Composition | Concentration (%) |
|-------------|-------------------|
| Moisture    | 71.10±0.00        |
| Protein     | 15.55±0.18        |
| Ash         | 0.37±0.03         |
| Crude Fat   | 11.63±0.10        |

<sup>^</sup> Reported as mean ± standard deviation from quadruplications.

**Table S2.** Odds Ratio Estimates<sup>1</sup> for predicting Purchase Intent (PI) = “yes” based on logistic regression modeling.

| Parameters             | PIB              |            | PIHP             |            | PIFWS            |            |
|------------------------|------------------|------------|------------------|------------|------------------|------------|
|                        | Pr > ChiSq       | Odds ratio | Pr > ChiSq       | Odds ratio | Pr > ChiSq       | Odds ratio |
| Gender                 | 0.93             | 0.98       | 0.78             | 0.92       | 0.27             | 1.35       |
| Nationality            | 0.28             | 1.70       | 0.30             | 1.86       | 0.38             | 0.70       |
| Overall Visual Quality | 0.66             | 0.93       | 0.92             | 1.02       | 0.52             | 0.91       |
| Color                  | 0.16             | 1.24       | 0.87             | 0.98       | 0.48             | 1.11       |
| Aroma                  | 0.66             | 0.96       | 0.25             | 1.13       | 0.67             | 1.04       |
| Texture                | 0.09             | 1.25       | 0.03             | 1.33       | 0.05             | 1.27       |
| Crispiness             | <b>0.02</b>      | 1.44       | 0.36             | 1.14       | 0.67             | 1.06       |
| Flavor                 | <b>&lt;.0001</b> | 2.69       | <b>&lt;.0001</b> | 2.63       | <b>&lt;.0001</b> | 2.40       |

<sup>1</sup>Significant odds ratios are in bold typeface ( $p$ -value < 0.05). PIB Purchase Intent Before message. PIHP purchase intent after Health and Protein message. PIFWS Purchase Intent after Food Waste and Sustainability message.
